# Supplementary material for: Chloroplast-based DNA barcode analysis indicates high discriminatory potential of matK locus in Himalayan temperate bamboos
Source: Springer Nature journal article supplement (doi:10.1007/s13205-020-02508-7), 2020-11-13
Supplement: 13205_2020_2508_MOESM2_ESM.pdf [file 13205_2020_2508_MOESM2_ESM.pdf]

**Supplementary Table S1** Location detail for the sampled bamboo species and NCBI GenBank accession numbers

| Sl. No.                                             | Name of the species           | Sample Code | Location                               | Latitude (N) | Longitude (E) | <i>rbcL</i> | <i>matK</i> | <i>psbK-I</i> | <i>rps16-trnQ</i> |
|-----------------------------------------------------|-------------------------------|-------------|----------------------------------------|--------------|---------------|-------------|-------------|---------------|-------------------|
| Bambuseae (Tropical and sub-tropical woody bamboos) |                               |             |                                        |              |               |             |             |               |                   |
| 1.                                                  | <i>Dendrocalamus strictus</i> | DS1         | FRC-BR, Aizawl, MZ                     | 23°43'       | 92°43'        | MT113216    | MT113248    | MT271323      | MT113284          |
|                                                     |                               | DS2         | Bambusetum, SFRI, Itanagar, AP         | 27°00'       | 93°43'        | MT113217    | MT113249    | MT271324      | MT113285          |
|                                                     |                               | DS3         | Bambusetum, IWST, Bangalore, KN        | 13°00'       | 77°34'        | MT113218    | MT113250    | MT271325      | MT113286          |
| 2.                                                  | <i>D. hamiltonii</i>          | DH1         | Bamboosetum, FRI<br>Source- NE India   | 30°20'       | 77°59'        | MT113207    | MT113237    | MT271310      | MT113274          |
|                                                     |                               | DH2         | Sairung, Aizawl, MZ                    | 23°47'       | 92°40'        | MT113208    | MT113238    | MT271311      | MT113275          |
|                                                     |                               | DH3         | Kimin, AP                              | 27°20'       | 93°50'        | MT113209    | MT113239    | MT271312      | -                 |
| 3.                                                  | <i>D. giganteus</i>           | DG1         | FRC-BR, Aizawl, MZ                     | 23°43'       | 92°43'        | MT113204    | MT113234    | MT271307      | MT113276          |
|                                                     |                               | DG2         | Mamit, MZ                              | 23°54'       | 92°29'        | MT113205    | MT113235    | MT271308      | MT113277          |
|                                                     |                               | DG3         | Bambusetum, SFRI, Itanagar, AP         | 27°00'       | 93°43'        | MT113206    | MT113236    | MT271309      | MT113278          |
| 4.                                                  | <i>D. longispathus</i>        | DL1         | FRC-BR, Aizawl, MZ                     | 23°43'       | 92°43'        | MT113211    | MT113242    | MT271315      | MT113279          |
|                                                     |                               | DL2         | Dampa Tiger Reserve, MZ                | 23°34'       | 92°24'        | MT113212    | MT113243    | MT271316      | MT113280          |
|                                                     |                               | DL3         | Near Dampui, Maimit, MZ                | 23°48'       | 92°29'        | MT113213    | MT113244    | MT271317      | MT113281          |
| 5.                                                  | <i>D. asper</i>               | DA1         | FRC-BR, Aizawl, MZ                     | 23°43'       | 92°43'        | MT113198    | MT113230    | MT271301      | MT113268          |
|                                                     |                               | DA2         | SFRI, Itanagar, AP                     |              |               | MT113199    | -           | MT271302      | MT113269          |
|                                                     |                               | DA3         | PlantissAgrotech Private Limited, UK   | 29°23'       | 79°30'        | MT113200    | MT113231    | MT271303      | MT113270          |
| 6.                                                  | <i>D. somdevae</i>            | DSO1        | Devalthal village chaopata, UK         | 29°41'       | 80°13'        | MT113222    | MT113251    | MT271329      | MT113295          |
|                                                     |                               | DSO2        | Bamboosetum, FRI<br>Source- NW India   | 30°20'       | 77°59'        | MT113223    | MT113252    | MT271330      | MT113296          |
|                                                     |                               | DSO3        | Tarag, Hamirpur, HP                    | 31°32'       | 76°37'        | MT113224    | MT113253    | MT271331      | MT113297          |
| 7.                                                  | <i>D. sikkimensis</i>         | DSK1        | FRC-BR, Aizawl, MZ                     | 23°43'       | 92°43'        | MT113219    | -           | MT271326      | MT113292          |
|                                                     |                               | DSK2        | Bambusetum, SFRI, Itanagar, AP         | 27°00'       | 93°43'        | MT113220    | -           | MT271327      | MT113293          |
|                                                     |                               | DSK3        | RFRI Jorhat, AS                        | 26°46'       | 95°17'        | MT113221    | -           | MT271328      | MT113294          |
| 8.                                                  | <i>D. latiflorus</i>          | DLF1        | Phakmung, Awang leikhai, Imphal,<br>MN | 24°52'       | 94°00'        | MT113214    | -           | MT271318      | MT113287          |
|                                                     |                               | DLF2        | Siphirzoramthanga garden, MZ           | 23°51'       | 92°44'        | MT113215    | MT113255    | MT271319      | MT113288          |
|                                                     |                               | DLF3        | FRC-BR, Aizawl, MZ                     | 23°43'       | 92°43'        | -           | -           | -             | -                 |
| 9.                                                  | <i>D. calostachyus</i>        | DC1         | Bambusetum, SFRI, Itanagar, AP         | 27°00'       | 93°43'        | MT113201    | -           | MT271304      | MT113271          |
|                                                     |                               | DC2         | Bamboosetum, FRI                       | 30°20'       | 77°59'        | MT113202    | MT113232    | MT271305      | MT113272          |

|                                                |                                   |      |                                        |        |        |          |          |          |          |
|------------------------------------------------|-----------------------------------|------|----------------------------------------|--------|--------|----------|----------|----------|----------|
|                                                |                                   |      | Source- NE India                       |        |        |          |          |          |          |
|                                                |                                   | DC3  | Bamboosetum, FRI<br>Source- NE India   | 30°20' | 77°59' | MT113203 | MT113233 | MT271306 | MT113273 |
| 10.                                            | <i>D. hookeri</i>                 | DHR1 | Kanglashipaiawangleikai, Imphal, MN    | 24°50' | 93°59' | MT113210 | MT113240 | MT271313 | MT113282 |
|                                                |                                   | DHR2 | Bambusetum, SFRI, Itanagar, AP         | 27°00' | 93°43' | -        | MT113241 | MT271314 | MT113283 |
| 11.                                            | <i>D. membranaceus</i>            | DMB1 | Bamboosetum, FRI                       | 30°20' | 77°59' | MT113225 | MT113245 | MT271320 | MT113289 |
|                                                |                                   | DMB2 | Source- Myanmar, Northeast India       |        |        | MT113226 | MT113246 | MT271321 | MT113290 |
|                                                |                                   | DMB3 | Forest Department campus, Ramnagar, UK | 29°23' | 79°07' | MT113227 | MT113247 | MT271322 | MT113291 |
| 12.                                            | <i>D. brandisii</i>               | DB1  | Bambusetum, SFRI, Itanagar, AP         | 27°00' | 93°43' | MT113228 | MT113256 | MT271332 | MT113298 |
| 13.                                            | <i>D. manipureanus</i>            | DM1  | Kanglashipaiawangleikai, Imphal, MN    | 24°50' | 93°59' | MT113229 | MT113254 | MT271333 | MT113299 |
| 14.                                            | <i>Bambusa pallida</i>            | BP   | Bamboosetum, FRI                       | 30°20' | 77°59' | MT294679 | MT271294 | MT271346 | MT113300 |
| 15.                                            | <i>Bambusa vulgaris</i>           | BV   | Bamboosetum, FRI                       | 30°20' | 77°59' | MT294680 | MT271292 | MT271347 | MT113301 |
| 16.                                            | <i>Bambusa multiplex</i>          | BM   | Bamboosetum, FRI                       | 30°20' | 77°59' | MT294681 | MT271296 | MT271348 | MT113302 |
| 17.                                            | <i>Bambusa nutans</i>             | BN   | Bamboosetum, FRI                       | 30°20' | 77°59' | MT294685 | MT271295 | MT271349 | MT113303 |
| 18.                                            | <i>Bambusa tulda</i>              | BT   | Bamboosetum, FRI                       | 30°20' | 77°59' | MT294682 | -        | MT271350 | MT113304 |
| 19.                                            | <i>Bambusa polymorpha</i>         | BPM  | Bamboosetum, FRI                       | 30°20' | 77°59' | MT294683 | MT271293 | MT271351 | MT113305 |
| 20.                                            | <i>Bambusa balcooa</i>            | BBL  | Bamboosetum, FRI                       | 30°20' | 77°59' | -        | MT271291 | MT271353 | MT113306 |
|                                                | <i>Bambusa burmanica</i>          | BB   | Bamboosetum, FRI                       | 30°20' | 77°59' | MT294684 | MT271290 | MT271352 | -        |
| 21.                                            | <i>Gigantochloa manggong</i>      | GM   | Bamboosetum, FRI                       | 30°20' | 77°59' | MT294686 | -        | MT271355 | MT113307 |
| 22.                                            | <i>Cephalostachyum pergracile</i> | CP   | Bamboosetum, FRI                       | 30°20' | 77°59' |          | MT271297 | MT271354 | MT113308 |
| 23.                                            | <i>Guadua angustifolia</i>        | GA   | Bamboosetum, FRI                       | 30°20' | 77°59' | MT294687 | MT271298 | MT271356 | MT113309 |
| 24.                                            | <i>Gigantochloa atroviolacea</i>  | GAV  | Bamboosetum, FRI                       | 30°20' | 77°59' | MT294688 | MT271299 | MT271357 | MT113310 |
| 25.                                            | <i>Melocanna baccifera</i>        | MB   | Bamboosetum, FRI                       | 30°20' | 77°59' | MT294689 | MT271300 | MT271358 | MT113311 |
| 26.                                            | <i>Thyrsostachys oliveri</i>      | TO   | Bamboosetum, FRI                       | 30°20' | 77°59' | MT294690 | -        | -        | MT113312 |
| <i>Arundinarieae (Temperate woody bamboos)</i> |                                   |      |                                        |        |        |          |          |          |          |
| 27.                                            | <i>Drepanostachyum falcatum</i>   | DF1  | Munsiyari, UK                          | 30°06' | 80°14' | MT294671 | MT271250 | MT271334 | MT113257 |
|                                                |                                   | DF2  | Kapkot, UK                             | 30°00' | 80°01' | MT294672 | MT271251 | MT271335 | MT113258 |
|                                                |                                   | DF3  | Binsar wildlife sanctuary, UK          | 29°41' | 79°49' | MT294673 | MT271252 | MT271336 | MT113259 |
|                                                |                                   | DF4  | Gwaldam, UK                            | 30°00' | 79°35' | -        | MT271253 | -        | -        |
|                                                |                                   | DF5  | Chakrata, UK                           | 30°57' | 77°45' | -        | MT271254 | -        | -        |

|     |                                   |      |                               |         |        |          |          |          |          |
|-----|-----------------------------------|------|-------------------------------|---------|--------|----------|----------|----------|----------|
|     |                                   | DF6  | Yamnotri, UK                  | 30°52'' | 78°18' | -        | MT271255 | -        | -        |
|     |                                   | DF7  | Mussourie, UK                 | 30°28'  | 78°03' | -        | MT271256 | -        | -        |
|     |                                   | DF8  | Bhatwari, UK                  | 30°56'  | 78°41' | -        | MT271257 | -        | -        |
|     |                                   | DF9  | Budakedar, UK                 | 30°38'  | 78°39' | -        | MT271258 | -        | -        |
|     |                                   | DF10 | Nainital, UK                  | 29°22'  | 79°26' | -        | MT271259 | -        | -        |
| 28. | <i>Yushania anceps</i>            | YA1  | Auli, Joshimath, UK           | 30°32'  | 79°33' | -        | MT271260 | MT271340 | MT113262 |
|     |                                   | YA2  | Auli, Joshimath, UK           | 30°32'  | 79°33' | MT294678 | MT271261 | MT271341 | MT113263 |
|     |                                   | YA3  | Munsiyari, UK                 | 30°03'  | 80°12' | -        | MT271262 | MT271342 | MT113264 |
|     |                                   | YA4  | Munsiyari, UK                 | 30°02'  | 80°11' | -        | MT271263 | -        | -        |
|     |                                   | YA5  | Ghens, Dewal, UK              | 30°07'  | 79°41' | -        | MT271264 | -        | -        |
|     |                                   | YA6  | Ghens, Dewal, UK              | 30°07'  | 79°41' | -        | MT271265 | -        | -        |
|     |                                   | YA7  | Narayan Ashram, Dharchula, UK | 29°58'  | 80°39' | -        | MT271266 | -        | -        |
|     |                                   | YA8  | Narayan Ashram, Dharchula, UK | 29°58'  | 80°39' | -        | MT271267 | -        | -        |
|     |                                   | YA9  | Chopta, UK                    | 30°28'  | 79°13' | -        | MT271268 | -        | -        |
|     |                                   | YA10 | Chopta, UK                    | 30°27'  | 79°14' | -        | MT271269 | -        | -        |
| 29. | <i>Himalayacalamus falconeri</i>  | HF1  | Munsiyari, UK                 | 30°04'  | 80°13' | -        | MT271270 | MT271337 | MT113265 |
|     |                                   | HF2  | Ghens, dewal, UK              | 30°7'1  | 79°43' | -        | MT271271 | MT271338 | MT113266 |
|     |                                   | HF3  | Ranachatti, UK                | 30°55'  | 78°22' | MT294677 | MT271272 | MT271339 | MT113267 |
|     |                                   | HF4  | Budakedar, UK                 | 30°39'  | 78°39' | -        | MT271273 | -        | -        |
|     |                                   | HF5  | Chopta, UK                    | 30°27'  | 79°15' | -        | MT271274 | -        | -        |
|     |                                   | HF6  | Pindari, UK                   | 30°10'  | 79°55' | -        | MT271275 | -        | -        |
|     |                                   | HF7  | Chopta, UK                    | 30°27'  | 79°13' | -        | MT271276 | -        | -        |
|     |                                   | HF8  | Chopta, UK                    | 30°27'  | 79°15' | -        | MT271277 | -        | -        |
|     |                                   | HF9  | Triyuginarayan, UK            | 30°27'  | 79°13' | -        | MT271278 | -        | -        |
|     |                                   | HF10 | Darma valley, UK              | 30°05'  | 80°37' | -        | MT271279 | -        | -        |
| 30. | <i>Thamnocalamus spathiflorus</i> | TS1  | Puraula, UK                   | 31°03'  | 77°56' | MT294674 | MT271280 | MT271343 | MT113260 |
|     |                                   | TS2  | Yamnotri, UK                  | 30°58'  | 78°26' | MT294675 | MT271281 | MT271344 | MT113261 |
|     |                                   | TS3  | Budakedar, Tehri              | 30°41'  | 78°40' | MT294676 | MT271282 | MT271345 | -        |
|     |                                   | TS4  | Narayan Ashram, Dharchula, UK | 29°59'  | 80°38' | -        | MT271283 | -        | -        |
|     |                                   | TS5  | Karandambugyal, Dharchula, UK | 30°01'  | 80°38' | -        | MT271284 | -        | -        |
|     |                                   | TS6  | Valley of flowers, UK         | 30°41'  | 79°35' | -        | MT271285 | -        | -        |

|                                                                                                                                                                                                                                                                                                                          |  |      |                  |        |        |   |          |   |   |
|--------------------------------------------------------------------------------------------------------------------------------------------------------------------------------------------------------------------------------------------------------------------------------------------------------------------------|--|------|------------------|--------|--------|---|----------|---|---|
|                                                                                                                                                                                                                                                                                                                          |  | TS7  | Pindari, UK      | 30°12' | 79°55' | - | MT271286 | - | - |
|                                                                                                                                                                                                                                                                                                                          |  | TS8  | Chopta, UK       | 30°28' | 79°13' | - | MT271287 | - | - |
|                                                                                                                                                                                                                                                                                                                          |  | TS9  | Har-ki-doon, UK  | 31°07' | 78°21' | - | MT271288 | - | - |
|                                                                                                                                                                                                                                                                                                                          |  | TS10 | Darma valley, UK | 30°10' | 80°34' | - | MT271289 | - | - |
| AP: Arunachal Pradesh, MZ: Mizoram, MN: Manipur, HP: Himachal Pradesh, UK: Uttarakhand, KN: Karnataka, FRI: Forest Research Institute, RFRI: Rain Forest Research Institute, SFRI: State Forest Research Institute, IWST: Institute of Wood Science and Technology, FRC-BR: Forest Research Centre for Bamboo and Rattan |  |      |                  |        |        |   |          |   |   |

**Supplementary Table S2** The detail of chloroplast barcode regions selected for evaluating in Indian bamboo species

| Sl. No. | Chloroplast region  | Primer name | Primer Sequence (5'-3')       | Author(S)                |
|---------|---------------------|-------------|-------------------------------|--------------------------|
| 1.      | <i>matK</i>         | 390F        | CGATCTATTCATTCAATATTTTC       | Cuenoud et al. 2002      |
|         |                     | 1326R       | TCTAGCACACGAAAGTCGAAGT        |                          |
|         |                     | MatK XF     | TAATTTACGATCAATTCATTC         | Ford et al. 2009         |
|         |                     | MatK 5R     | GTTCTAGCACAAGAAAGTCG          |                          |
| 2.      | <i>rbcL</i>         | 1F          | ATGTCACCACAAACAGAAAC          | Fay et al. 1997          |
|         |                     | 724R        | TCGCATGTACCTGCAGTAGC          | Kress and Erickson 2007  |
|         |                     | rbcLa_r     | CTTCTGCTACAAATAAGAATCG-ATCTC  |                          |
| 3.      | <i>ycf1</i>         | ycf1bF      | TCTCGACGAAAATCAGATTGT-TGTGAAT | Dong et al. 2015         |
|         |                     | ycf1bR      | ATACATGTCAAAGTGATGGAAAA       |                          |
| 4.      | <i>ndhF</i> (3'end) | 972F        | GTCTCAATTGGGTTATATGATG        | Olmstead and Sweere 1994 |
|         |                     | 2110R       | CCCCCTAYATATTTGATACCTT-CTCC   |                          |
| 5.      | <i>rps16-trnQ</i>   | 5'end 1F    | GCACGTTGCTTTTCTACCACA         | Triplett and Clark 2010  |
|         |                     | 929R        | TTCTGTCTACTCGGCTTTTCG         |                          |
|         |                     | 3'end 538F  | CGACTCGAATACCAAAGAGG          |                          |
|         |                     | 1574R       | ATCCTTCCGTCCCAGATTTT          |                          |
| 6.      | <i>trnC-rpoB</i>    | trnCF       | TGGGGATAAAGGATTTGCAG          | Yamane and Kawahara 2005 |
|         |                     | rpoBR       | ATTGTGGACATTCCCTCRTT          |                          |
| 7.      | <i>trnD-T</i>       | trnD-F      | ACCAATTGAACTACAATCCC          | Demesure et al. 1995     |
|         |                     | trnT-R      | CCCTTTTAACTCAGTGGTA           | Triplett and Clark 2010  |
| 8.      | <i>trnT-L</i>       | trnT-L F    | CATTACAAATGCGATGCTCT          | Taberlet et al. 1991     |
|         |                     | trnT-L R    | TCTACCGATTTCCGCATATC          |                          |
| 9.      | <i>trnL-F</i>       | trnL- F     | CGAAATCGGTAGACGCTACG          | Taberlet et al. 1991     |
|         |                     | trnF- R     | ATTTGAACTGGTGACACGAG          |                          |
| 10.     | <i>trnH-psbA</i>    | trnH2       | CGCGCATGGTGGATTCACAATCC       | Tate and Simpson 2003    |
|         |                     | psbA        | GTTATGCATGAACGTAATGCTC        | Sang et al. 1997         |
| 11.     | <i>psbK-I</i>       | psbK        | TTAGCCTTTGTTTGGCAAG           | Lahaye et al. 2008       |
|         |                     | psbI        | AGAGTTTGAGAGTAAGCAT           |                          |
